# Supplementary material for: Neuronal ApoE Regulates the Cell-to-Cell Transmission of α-Synuclein
Source: MDPI journal article supplement (doi:10.3390/ijms23158311), 2022-07-27
Supplement: s1 [file s1]

# Supplementary Materials

## Neuronal ApoE regulates the cell-to-cell transmission of $\alpha$ -synuclein

Seo-Jun Kang<sup>1,2,3</sup>, Soo-Jeong Kim<sup>2</sup>, Hye Rin Noh<sup>1,2,3</sup>, Beom Jin Kim<sup>1,2,3</sup>, Jae-Bong Kim<sup>1,2,3</sup>, Uram Jin<sup>1,2,3,4</sup>, Sun Ah Park<sup>2,3,5,6</sup> and Sang Myun Park<sup>1,2,3,\*</sup>

<sup>1</sup>Department of Pharmacology, Ajou University School of Medicine, Suwon, Korea, <sup>2</sup>Center for Convergence Research of Neurological Disorders, Ajou University School of Medicine, Suwon, Korea, <sup>3</sup>Neuroscience Graduate Program, Department of Biomedical Sciences, Ajou University School of Medicine, Suwon, Korea, <sup>4</sup>Department of Cardiology, Ajou University School of Medicine, Suwon, Korea, <sup>5</sup>Department of Anatomy, Ajou University School of Medicine, Suwon, Korea, <sup>6</sup>Department of Neurology, Ajou University School of Medicine, Suwon, Korea

\* Correspondence: Dr. Sang Myun Park, Department of Pharmacology, Ajou University School of Medicine, 164, Worldcup-ro, Yeongtong-gu, Suwon, 16499, Korea, Tel: 82-31-219-5063, Fax: 82-31-219-5069, E-mail: sangmyun@ajou.ac.kr

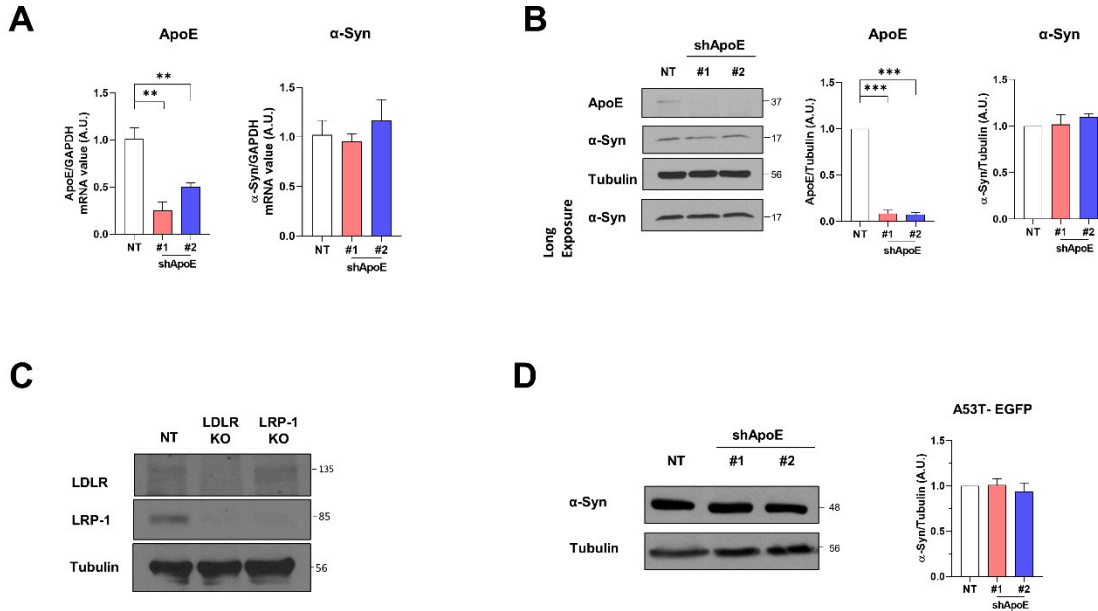

**Figure S1.** (A) NT, ApoE KD #1, and #2 SH-SY5Y cells were analyzed by RT-PCR. (B) NT, ApoE KD #1 and #2 SH-SY5Y cells were lysed, and western blot was performed with the indicated antibodies. (C) LDLR KO and LRP-1 KO SH-SY5Y cells were lysed, and western blot was performed with the indicated antibodies. Note that the level of LRP-1 in LDLR KO SH-SY5Y cells was also decreased. It may be due that the possible off-target loci for gRNA of LDLR used in the present study are distributed at LRP-1 sequences which are located at 4475 to 4495 bp. (D) NT and ApoE KD #1, #2/A53T  $\alpha$ -syn-EGFP OE SH-SY5Y cells were lysed, and western blot was performed with the indicated antibodies. Values were derived from three independent experiments ( $n = 3$ ). \*\* $P < 0.01$ , \*\*\* $P < 0.001$  against control; one-way ANOVA.

Bregma 2.1 mm

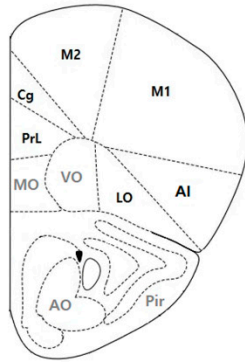

Bregma 0.98 mm

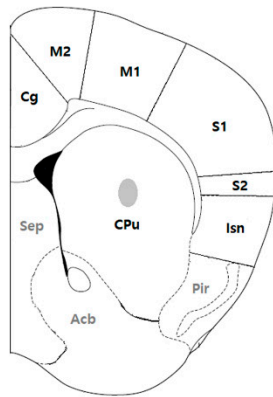

Bregma 0.14 mm

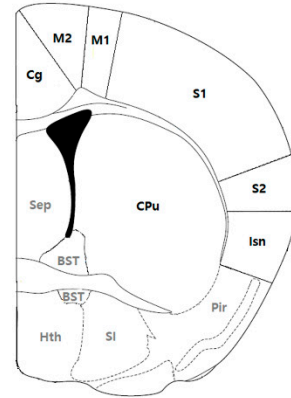

Bregma -1.58 mm

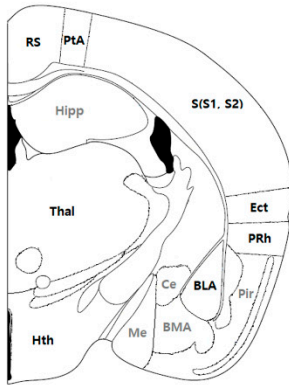

Bregma -3.08 mm

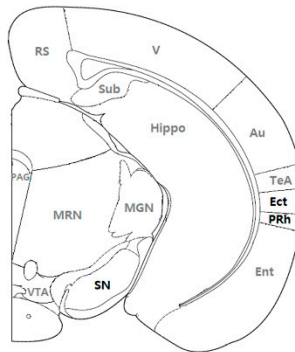

**Figure S2.** Schematic images of the regions annotated for pathology measures and used in subsequent analysis. Bolded regions were analyzed. Abbreviations : Cg1 = cingulate cortex 1; M1 = motor cortex 1; M2 = motor cortex 2; AI = agranular insular cortex; LO = lateral orbital cortex; Prl = prelimbic cortex; Cg = cingulate cortex; S1 = somatosensory cortex 1; S2 = somatosensory cortex 2; Ins = insular cortex; Cpu = caudate putamen (striatum); RS = retrosplenial cortex; PtA = parietal association cortex; S = somatosensory cortex; Ect = ectorhinal cortex; PRh = perirhinal cortex; CeA = central amygdaloid nucleus; BLA = basolateral amygdaloid nucleus; BMA = basomedial amygdaloid nucleus; Thal = thalamic nuclei; SN = substantia nigra.

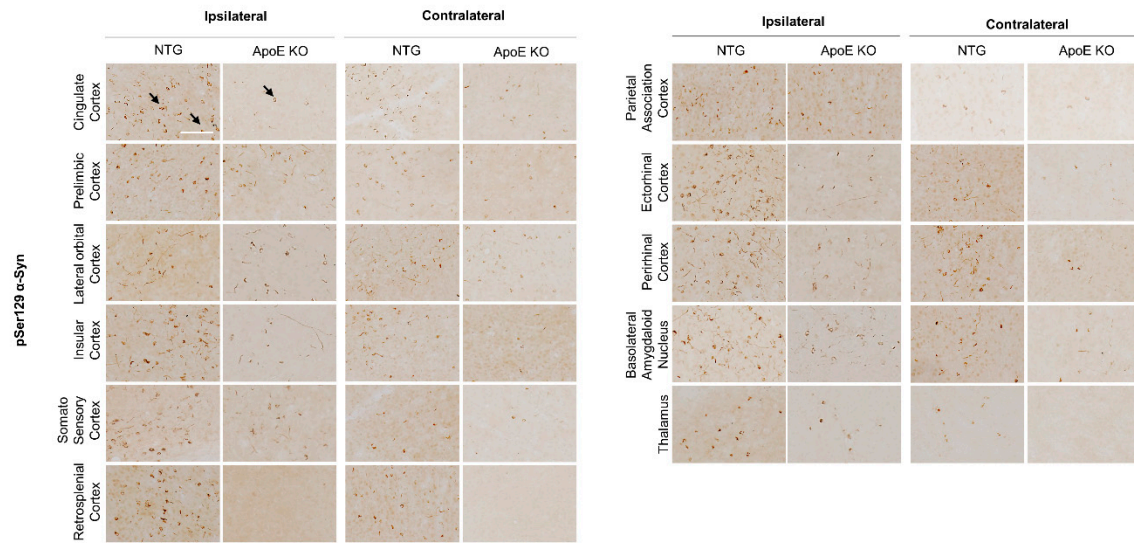

**Figure S3.** 2–3-month-old WT (n = 13) and ApoE KO (n = 9) mice were injected into the striatum with 10 µg of recombinant mouse α-syn fibrils. After 12 weeks, immunohistochemistry of pSer129 α-syn was performed. Images are representatives of each region. The scale bar indicates 100 µm.

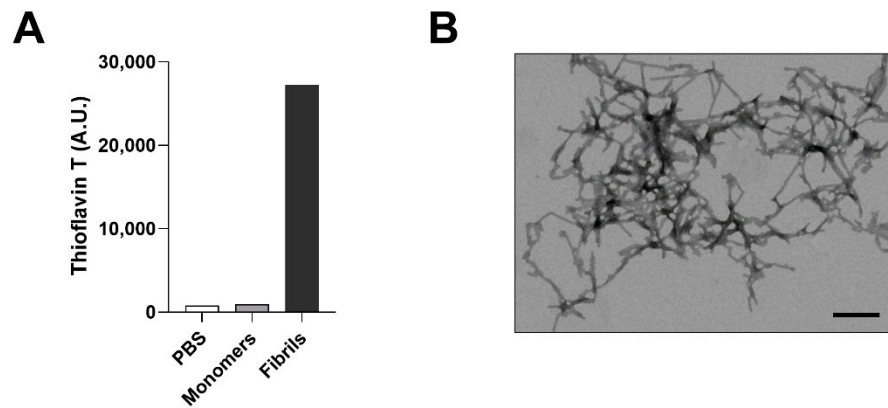

**Figure S4.** Recombinant  $\alpha$ -Syn were analyzed by Thioflavin T assay and electron microscopy. (A)  $\alpha$ -Syn monomers and fibrils were mixed with 20  $\mu$ M thioflavin T assay buffer (250 mM glycine, pH 8.5). The fluorescences were measured at 482 nm with an excitation at 446 nm using Synergy H1 (Biotek, Winooski, VT, USA). (B)  $\alpha$ -Syn fibrils were treated onto a carbon-coated copper grid (#CF200-CU, Electron Microscopy Sciences, Ft. Washington, PA, USA) followed by negative staining with 2% uranyl acetate for 2 min. The grid was washed gently with distilled water and dried for 10 mins.  $\alpha$ -Syn fibrils were then observed with a SIGMA500 electron microscope (Carl Zeiss, Oberkochen, Germany). The scale bar indicates 200 nm.
